# Supplementary material for: Overexpression of CCL-20 and CXCL-8 genes enhances tumor escape and resistance to cemiplimab, a programmed cell death protein-1 (PD-1) inhibitor, in patients with locally advanced and metastatic cutaneous squamous cell carcinoma
Source: PubMed Central journal article supplement — Oncoimmunology. 2024 Aug 26;13(1):2388315. doi: 10.1080/2162402X.2024.2388315 (PMC11352706; doi:10.1080/2162402x.2024.2388315), 2024-08-26

**Supplementary figure 1.** Subgroup Progression free survival Kaplan-Meier curves according to performed previous surgery **(a)**, radiotherapy **(b)**.

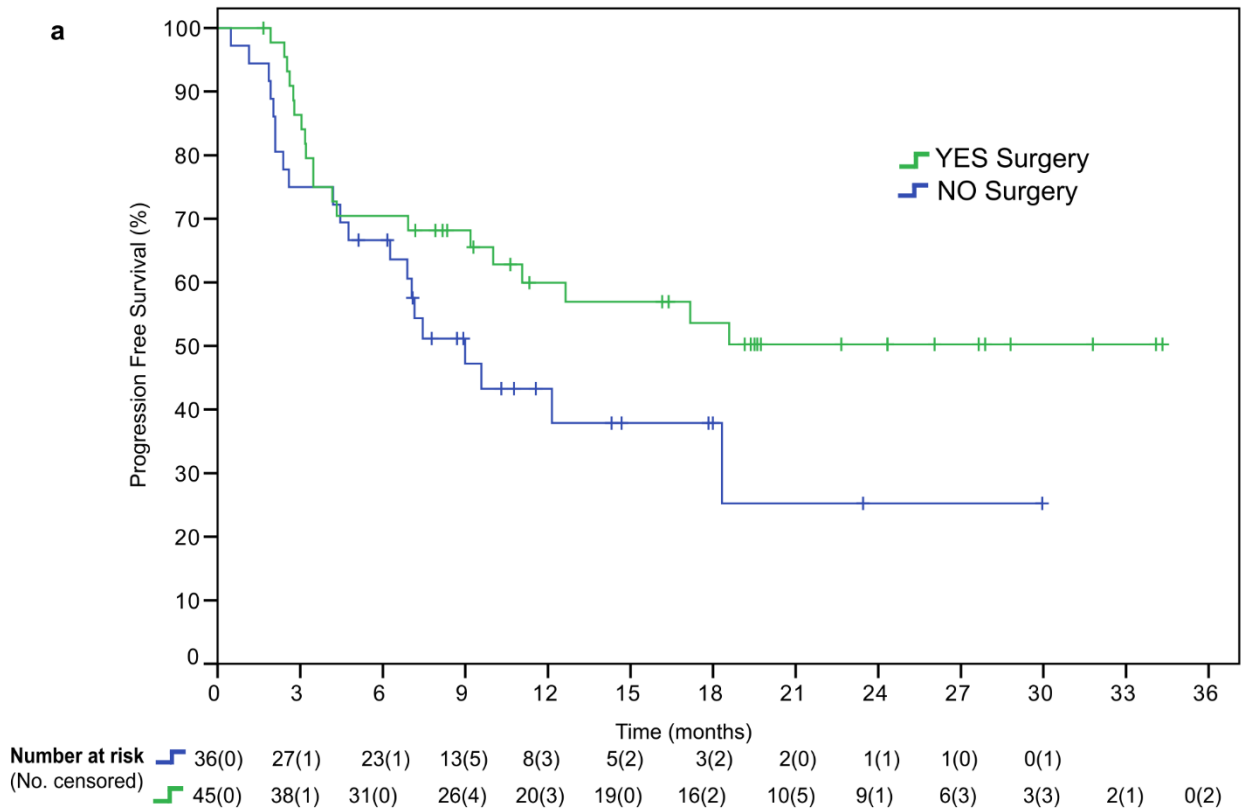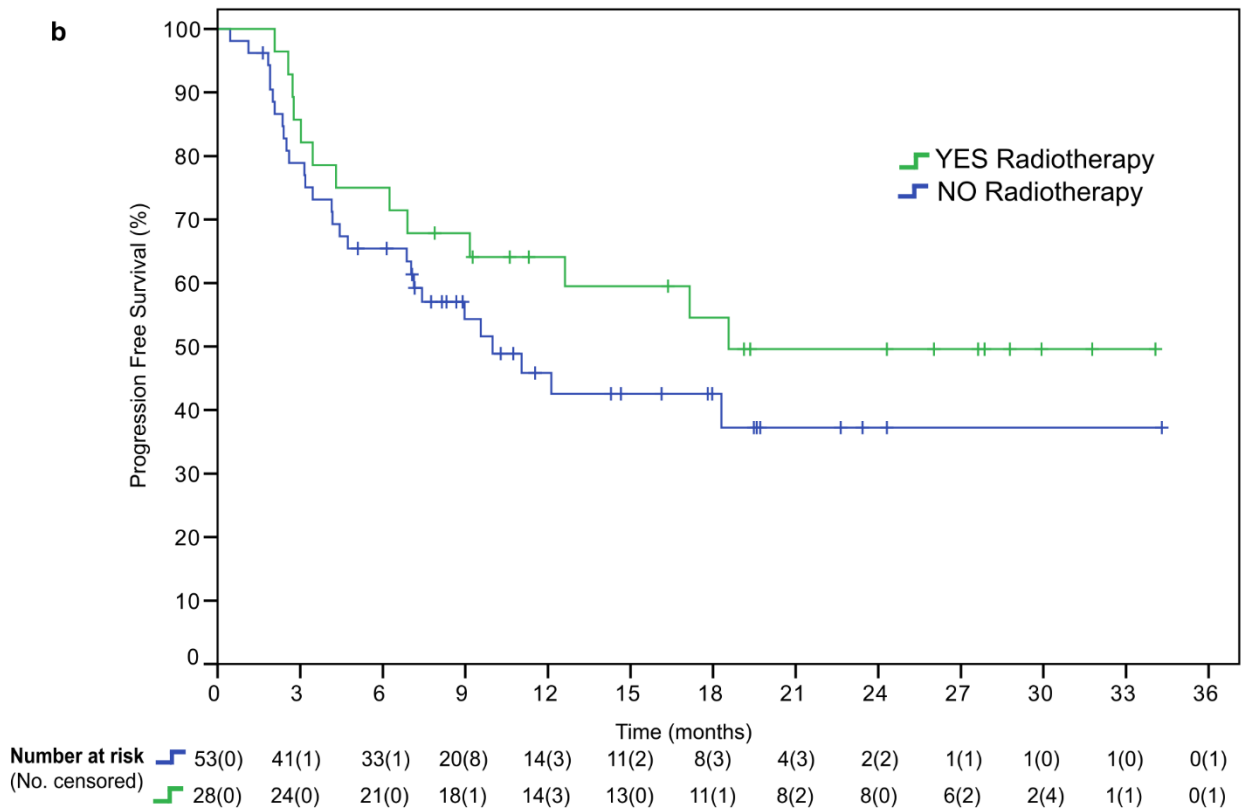

**Supplementary figure 2.** Subgroup Overall Survival Kaplan-Meier curves according to performed previous surgery (a), or radiotherapy (b).

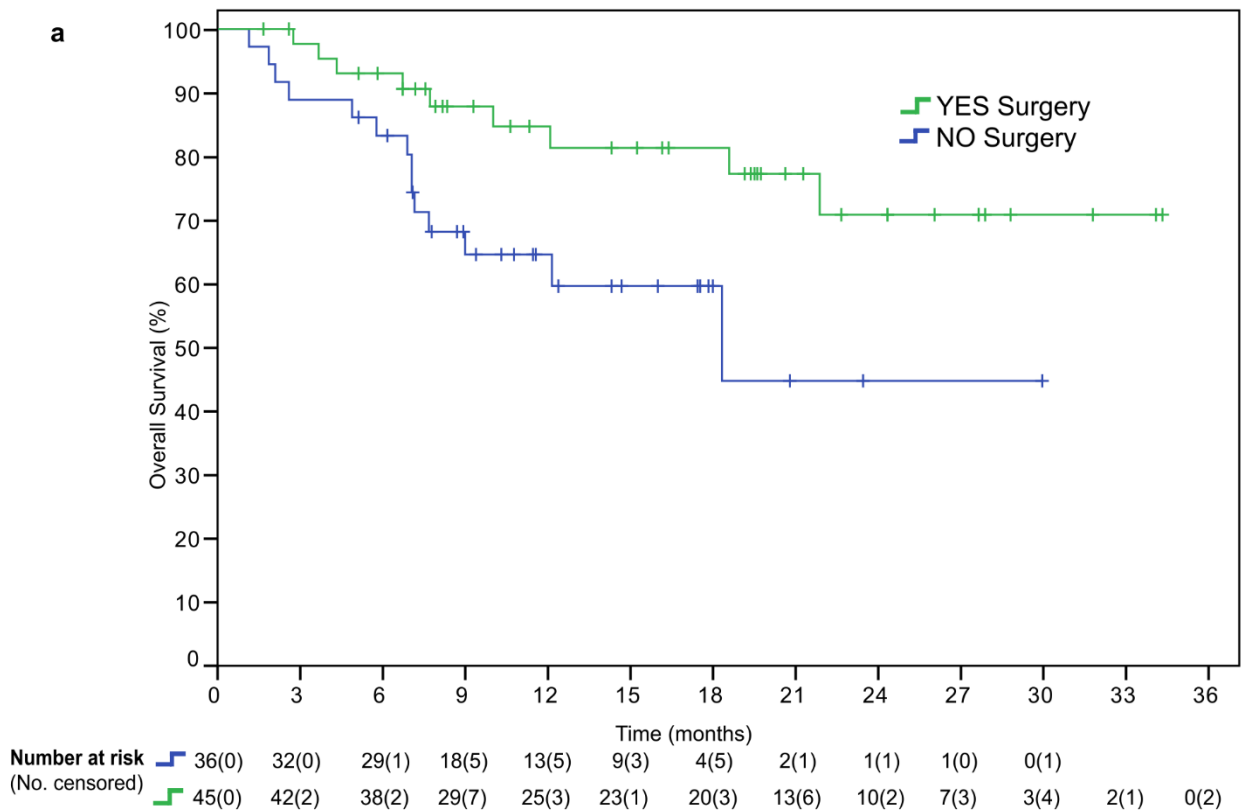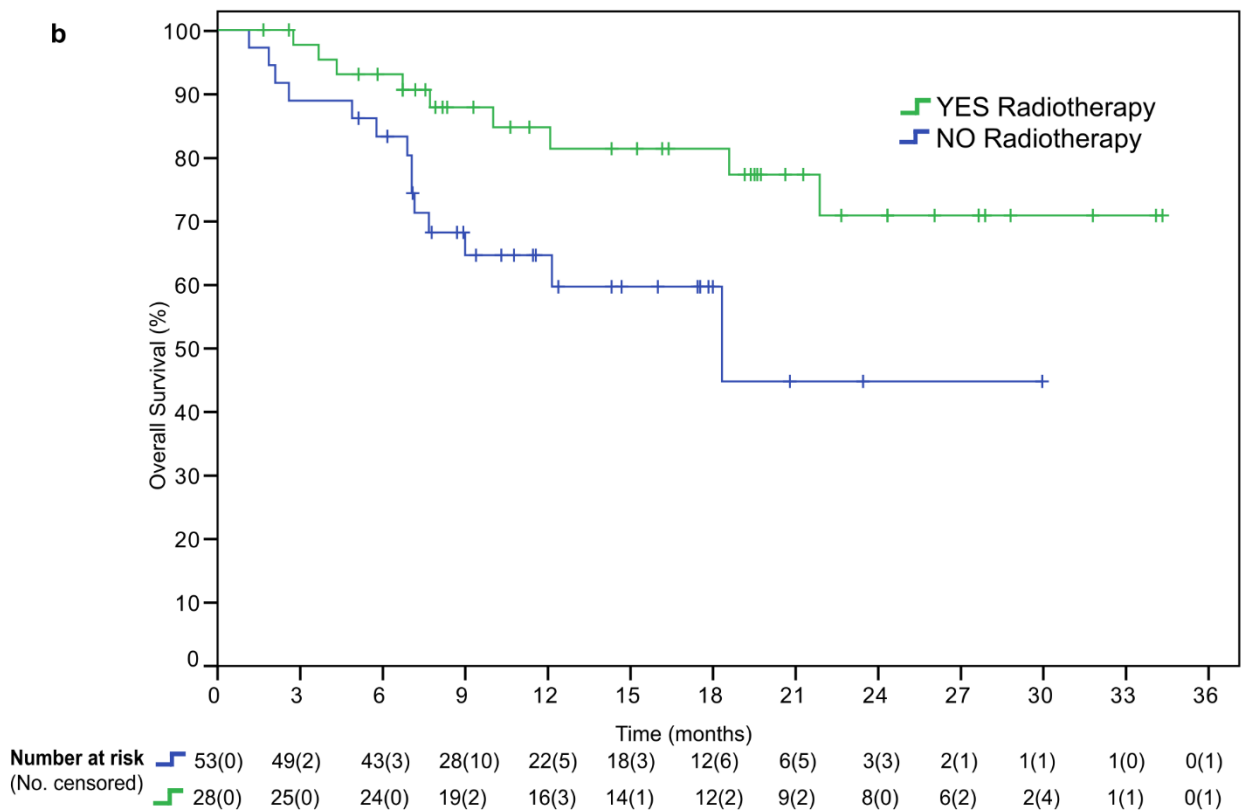

**Supplementary figure 3.** Subgroup Progression Free Survival Kaplan-Meier curves according to experienced adverse events in the overall population.

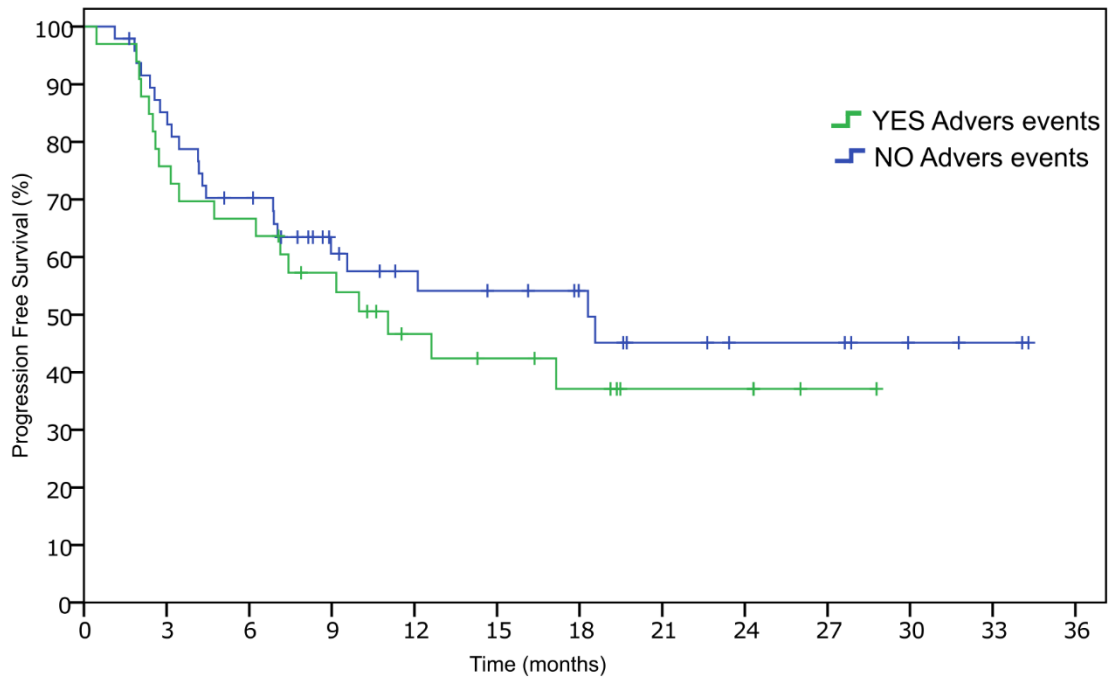

|                                  |                   | 0     | 3     | 6     | 9     | 12    | 15    | 18    | 21   | 24   | 27   | 30   | 33   | 36   |
|----------------------------------|-------------------|-------|-------|-------|-------|-------|-------|-------|------|------|------|------|------|------|
| Number at risk<br>(No. censored) | NO Advers events  | 48(0) | 40(1) | 32(1) | 21(7) | 17(3) | 15(1) | 12(3) | 8(2) | 6(2) | 6(0) | 3(3) | 2(1) | 0(2) |
|                                  | YES Advers events | 33(0) | 25(0) | 22(0) | 17(2) | 11(3) | 9(1)  | 7(1)  | 4(3) | 4(0) | 1(3) | 0(1) |      |      |

**Supplementary figure 4.** Volcano plot showing top up-regulated genes encoding for cytokines and chemokines, cell proliferation pathway and apoptosis pathway in responder samples compared to healthy donors.

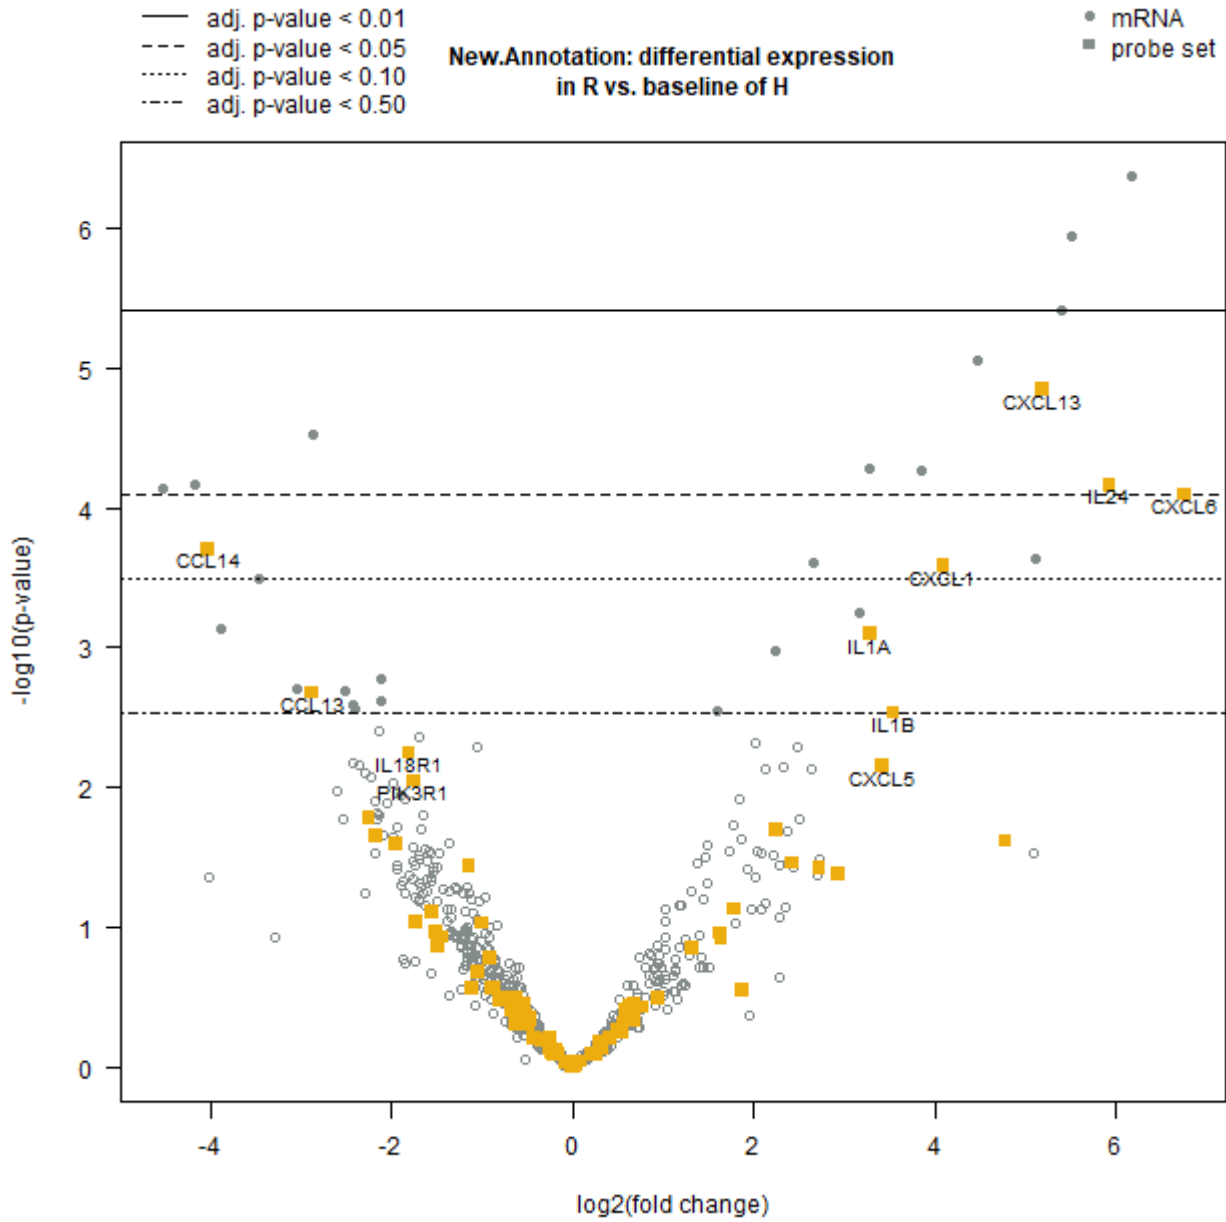

- adj. p-value < 0.01
- - - adj. p-value < 0.05
- ..... adj. p-value < 0.10
- · - · - adj. p-value < 0.50

**New.Annotation: differential expression  
in R vs. baseline of H**

- mRNA
- probe set

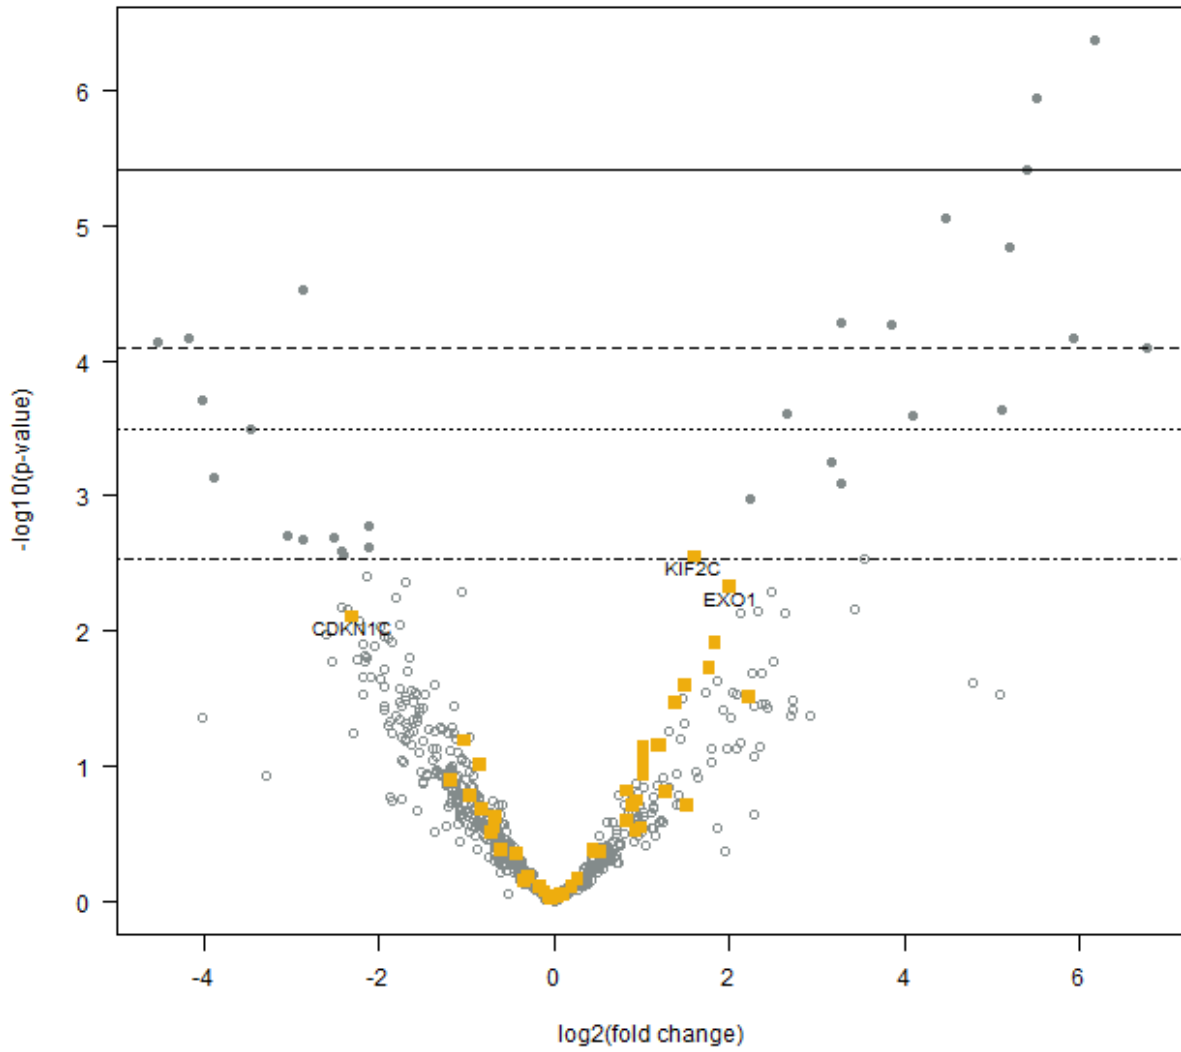

- adj. p-value < 0.01
- - - adj. p-value < 0.05
- ..... adj. p-value < 0.10
- · - · - adj. p-value < 0.50

**New.Annotation: differential expression  
in R vs. baseline of H**

- mRNA
- probe set

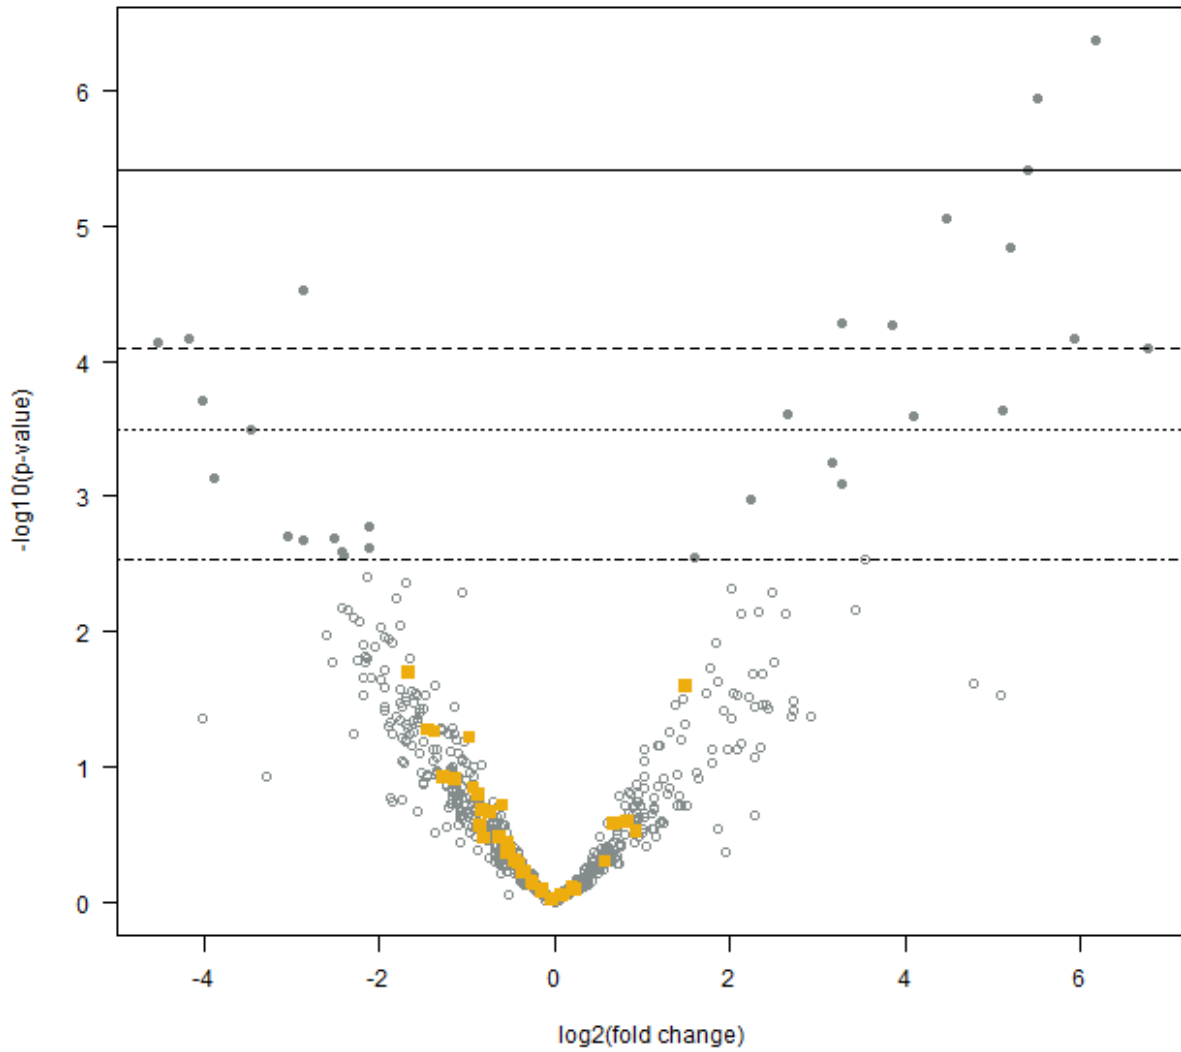

Supplement: KONI_A_2388315_SM0692.pdf [file KONI_A_2388315_SM0692.pdf]
